# Supplementary material for: Vascular inflammation, atherosclerosis, and lipid metabolism and the occurrence of non-high albuminuria diabetic kidney disease: A cross-sectional study
Source: PubMed Central journal article supplement — Diab Vasc Dis Res. 2021 Feb 10;18(1):1479164121992524. doi: 10.1177/1479164121992524 (PMC8482348; doi:10.1177/1479164121992524), 2021-02-10
Supplement: sj-pdf-1-dvr-10.1177_1479164121992524.pdf [file sj-pdf-1-dvr-10.1177_1479164121992524.pdf]

This is an English version, the original Chinese version is attached.

**Review Report on Scientific Research Ethics of  
Mianyang Central Hospital**

No.: 201400048

|                                                                                                                                                                                                                  |                                                                                 |                  |            |
|------------------------------------------------------------------------------------------------------------------------------------------------------------------------------------------------------------------|---------------------------------------------------------------------------------|------------------|------------|
| <b>Review Project</b>                                                                                                                                                                                            | Multi-center study on the development and clinical application of NGAL test kit |                  |            |
| <b>Department</b>                                                                                                                                                                                                | Department of Laboratory Medicine                                               | <b>Applicant</b> | Jiafu Feng |
| <b>Application Time</b>                                                                                                                                                                                          | Mar. 2014                                                                       |                  |            |
| <b>Review Submitted Materials</b>                                                                                                                                                                                | Ethical Review's Application of Mianyang Central Hospital                       |                  |            |
| <b>Review Verdict of Ethics Committee:</b><br><br>After review by the ethics committee, the subject conforms to ethical principles.<br><br><p style="text-align: right;">Signature: Mei He<br/>Mar. 14, 2014</p> |                                                                                 |                  |            |
| <b>Notes:</b>                                                                                                                                                                                                    |                                                                                 |                  |            |

绵阳市中心医院  
科研项目伦理审查意见

编号：201400048

|                                                                                                                                                |                        |     |     |
|------------------------------------------------------------------------------------------------------------------------------------------------|------------------------|-----|-----|
| 审查项目                                                                                                                                           | NGAL检测试剂盒研发及临床应用的多中心研究 |     |     |
| 申请部门                                                                                                                                           | 检验科                    | 申请人 | 俸家富 |
| 申请时间                                                                                                                                           | 2014年3月                |     |     |
| 审查报送材料                                                                                                                                         | 绵阳市中心医院伦理审查申请表         |     |     |
| 伦理委员会审查意见：<br><br>经审查，符合伦理相关原则。<br><br> <p>2014年3月14日</p> |                        |     |     |
| 备注：                                                                                                                                            |                        |     |     |
